# Supplementary material for: Public Stigma Associated With Psychosis Risk Syndrome in a College Population: Implications for Peer Intervention
Source: Atypon-hosted journal article supplement (doi:10.1176/appi.ps.003782011), 2013-03-01
Supplement: 284_ds001.pdf [file 284_ds001.pdf]

Online Appendix

Online Table. Stigma dimensions and measures

| Stigma Dimensions                                                                                                                                                                   | Study Measure                                  | Item                                                                                                                                                                                                                                                                                                                                                                                                                                                                                                                                                    | Original Item Response Format                                                                           | Item Transformation           | Score Range |
|-------------------------------------------------------------------------------------------------------------------------------------------------------------------------------------|------------------------------------------------|---------------------------------------------------------------------------------------------------------------------------------------------------------------------------------------------------------------------------------------------------------------------------------------------------------------------------------------------------------------------------------------------------------------------------------------------------------------------------------------------------------------------------------------------------------|---------------------------------------------------------------------------------------------------------|-------------------------------|-------------|
| I. Stereotyping: When beliefs of a cultural group connect labeled individuals to negative characteristics                                                                           | A. Illness Course - 6-item scale(1)            | 1. "It is unlikely that John will ever be completely free of this condition"<br>2. "Even if John has been free of his condition for years, it might return at any time"<br>3. "Even if John's symptoms are controlled, John will always remain vulnerable to this condition";<br>4. "John can be permanently cured of his/her condition" (reverse scored)<br>5. "John needs to be treated for his/her whole life, or the condition may return"<br>6. "Even if John's symptoms are eliminated, the underlying condition will always remain within John." | (1) Strongly disagree;<br>(2) Somewhat disagree;<br>(3) Somewhat agree;<br>(4) Strongly agree           | (0) disagree;<br>(1) agree    | 0 – 6       |
|                                                                                                                                                                                     | B. Violence Toward Others - single-item (2)    | "How likely is it that John would do something violent towards other people?"                                                                                                                                                                                                                                                                                                                                                                                                                                                                           | (1) Not at all likely;<br>(2) Not very likely;<br>(3) Somewhat likely;<br>(4) Very likely               | (0) not likely;<br>(1) likely | 0 – 1       |
|                                                                                                                                                                                     | C. Violence Toward Self - single-item (2)      | "How likely is it that John would do something violent towards himself?"                                                                                                                                                                                                                                                                                                                                                                                                                                                                                | (1) Not at all likely<br>(2) Not very likely;<br>(3) Somewhat likely;<br>(4) Very likely                | (0) not likely;<br>(1) likely | 0 – 1       |
| II. Status Loss & Discrimination: Whereby certain members of society are deemed less capable than others, resulting in unfair treatment, including individual-level discrimination. | A. Casual Social Distance - 2-item scale (3)   | 1. "How willing are you to have someone like John as a neighbor?"<br>2. How willing are you to be close friends with someone like John?"                                                                                                                                                                                                                                                                                                                                                                                                                | (1) Definitely willing;<br>(2) Somewhat willing;<br>(3) Somewhat unwilling;<br>(4) Definitely unwilling | (0) willing;<br>(1) unwilling | 0 – 2       |
|                                                                                                                                                                                     | B. Intimate Social Distance - 2-item scale (3) | 1. How willing are you to allow a child of yours to date John?"<br>2. How willing are you to allow a child of yours to marry John?"                                                                                                                                                                                                                                                                                                                                                                                                                     | (1) Definitely willing;<br>(2) Somewhat willing;<br>(3) Somewhat unwilling;<br>(4) Definitely unwilling | (0) willing;<br>(1) unwilling | 0 – 2       |
|                                                                                                                                                                                     | C. Unwillingness to Help - 2-item scale (4)    | 1. "I would be willing to talk to John about his problems?" (reverse scored)<br>2. "How certain would you feel that you would help John?" (reverse scored)                                                                                                                                                                                                                                                                                                                                                                                              | 9-point scale:<br>(0) Not at all<br>(8) Very much                                                       |                               | 0 – 16      |
|                                                                                                                                                                                     | D. Treatment Coercion - single-item (4)        | "How much do you agree that John should be forced into treatment with his doctor even if he does not want to?"                                                                                                                                                                                                                                                                                                                                                                                                                                          | 9-point scale:<br>(0) Not at all<br>(8) Very much                                                       |                               | 0 – 8       |

## References for Measures (online)

1. Phelan JC: Geneticization of deviant behavior and consequences for stigma: The case of mental illness. *Journal of Health and Social Behavior* 46: 307-322, 2005.
2. Link BG: Public conceptions of mental illness: Labels, causes, dangerousness, and social distance. *American Journal of Public Health* 89: 9, 1999.
3. Link BG, Cullen FT, Struening E: A modified labeling theory approach to mental disorders: an empirical assessment. *American Sociological Review* 54: 400-423, 1989.
4. Corrigan PW, River LP, Lundin RK, et al: Three strategies for changing attributions about severe mental illness. *Schizophrenia Bulletin* 27: 187-195, 2001.
